# Supplementary material for: Swift synthesis, functionalization and phase-transfer studies of ultrastable, visible light emitting oleate@ZnO quantum dots
Source: Royal Society of Chemistry journal article supplement (doi:10.1039/c5tc03377b), 2015-01-01
Supplement: c5tc03377b1.pdf [file c5tc03377b1.pdf]

# Journal of Materials Chemistry-C

## Supporting Information

### Swift Synthesis, Functionalization and Phase-transfer Studies of Ultrastable, Visible Light Emitting Oleate@ZnO Quantum Dots

*Osman Arslan,<sup>[a]</sup> Lhoussaine Belkoura<sup>[b]</sup> and Sanjay Mathur<sup>[a].\*</sup>*

[a] Institute of Inorganic Chemistry, University of Cologne, D-50939 Cologne, Germany

Fax: +49 221 470 4899; Tel: +49 221 470 4107;

Correspondence: [sanjay.mathur@uni-koeln.de](mailto:sanjay.mathur@uni-koeln.de)

[b] Institute of Physical Chemistry, University of Cologne, D-50939 Cologne, Germany

KEYWORDS: ZnO QDs, cell labeling, phase transfer, visible emission

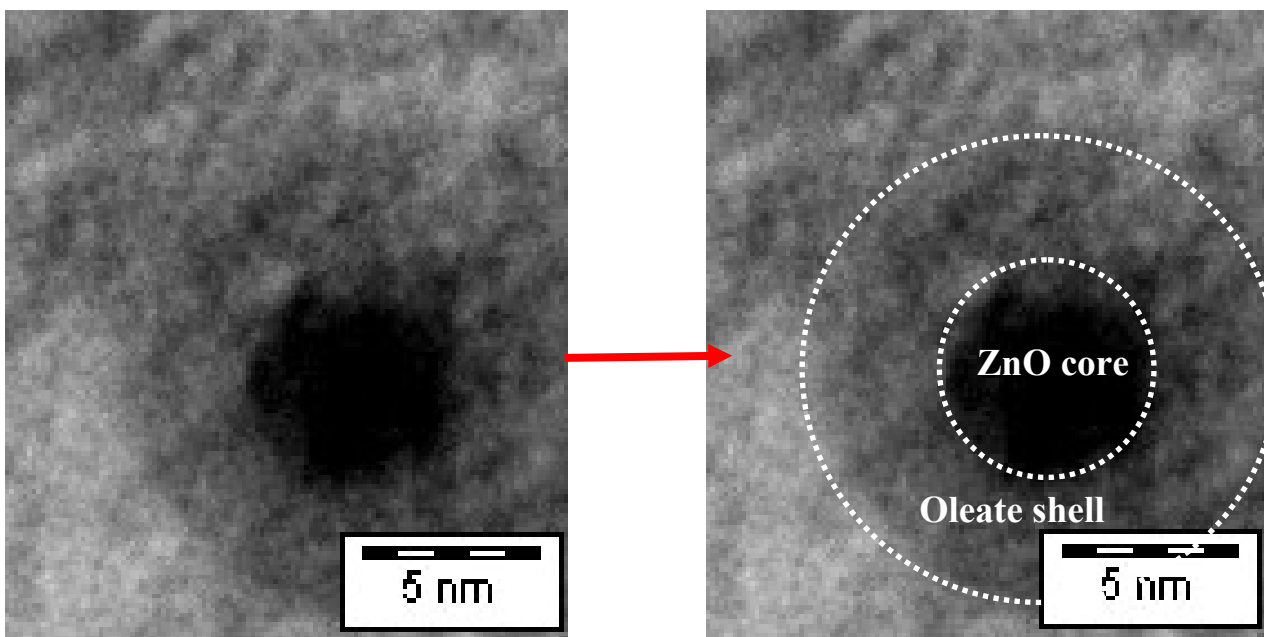

Supporting Figure 1: Core-shell structure of the Oleate@ZnO QDs for the synthesized Oleate@QDs

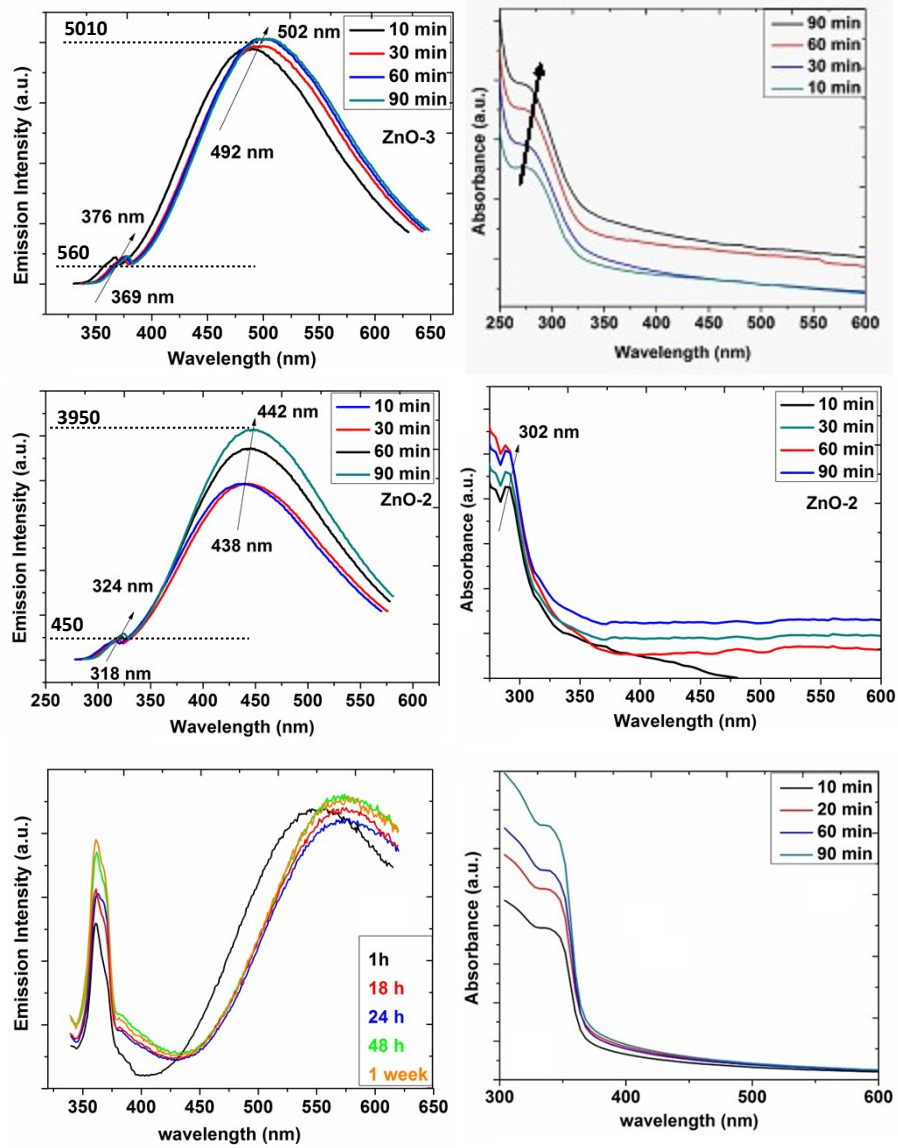

Supporting Figure 2: PL and UV-Vis properties of ZnO-2, ZnO-3 ve ZnO-4,

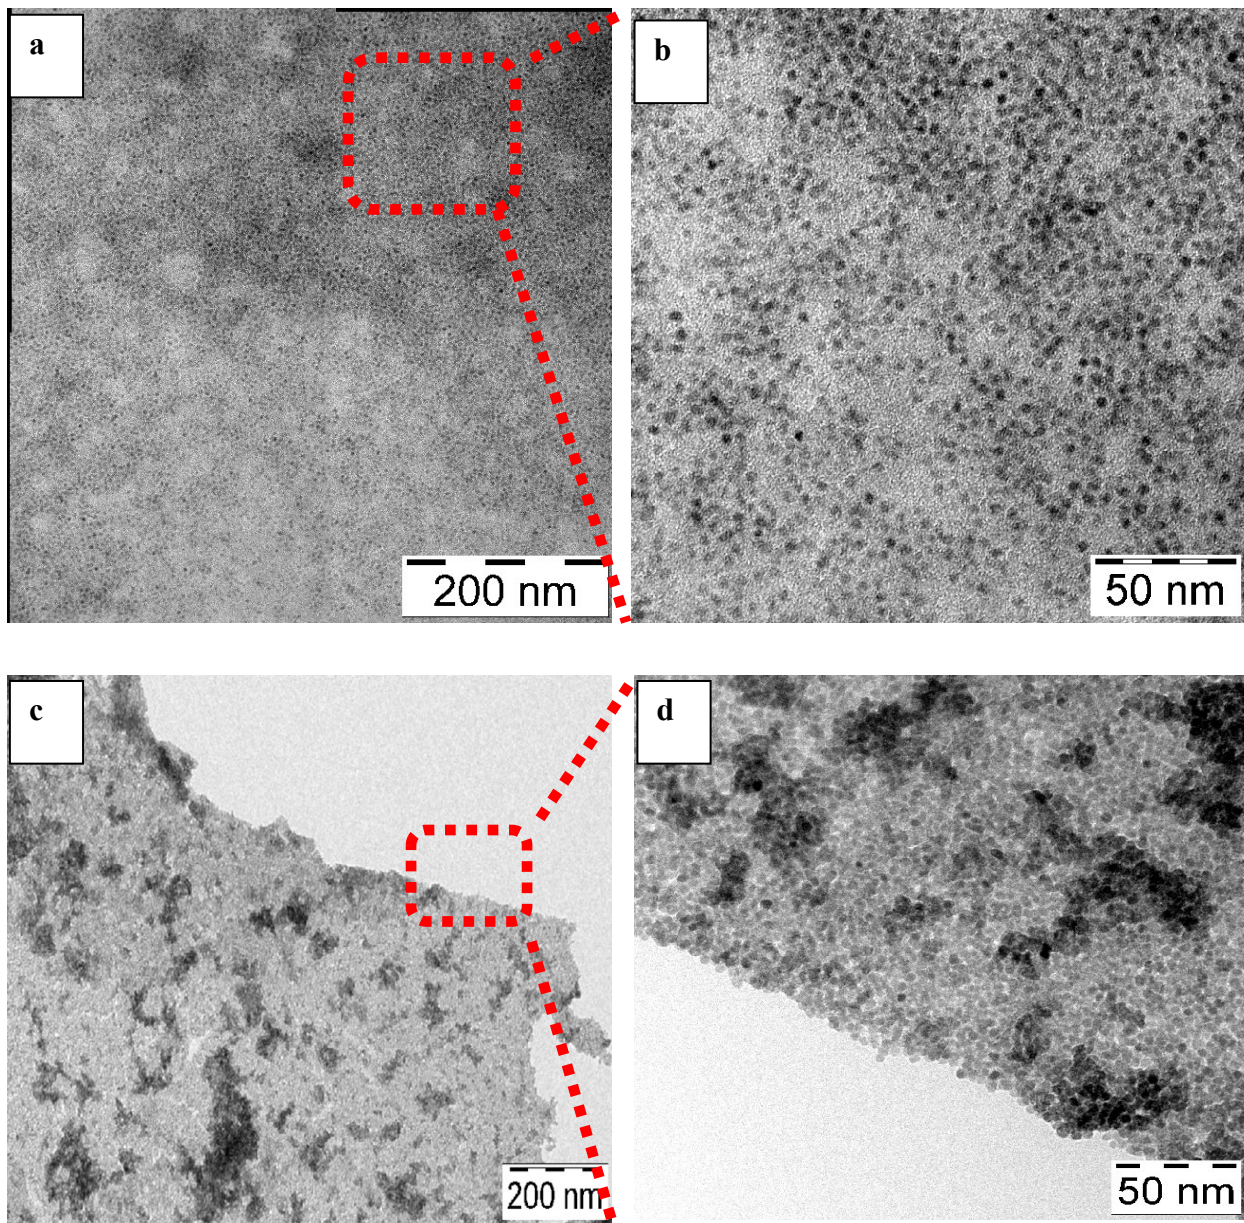

Supporting Figure 3: Comparison of the agglomeration behavior of a-b) Oleate@ZnO QD and c-d) Acetate@ZnO's



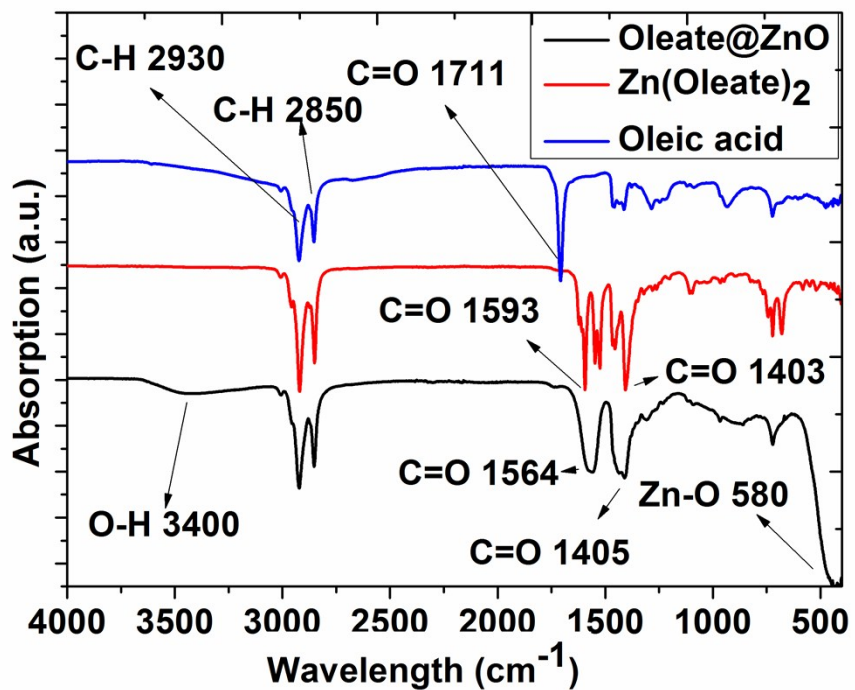

Supporting Figure 4: FT-IR observation of transformation of molecular precursor in the Oleate@ZnO QDs

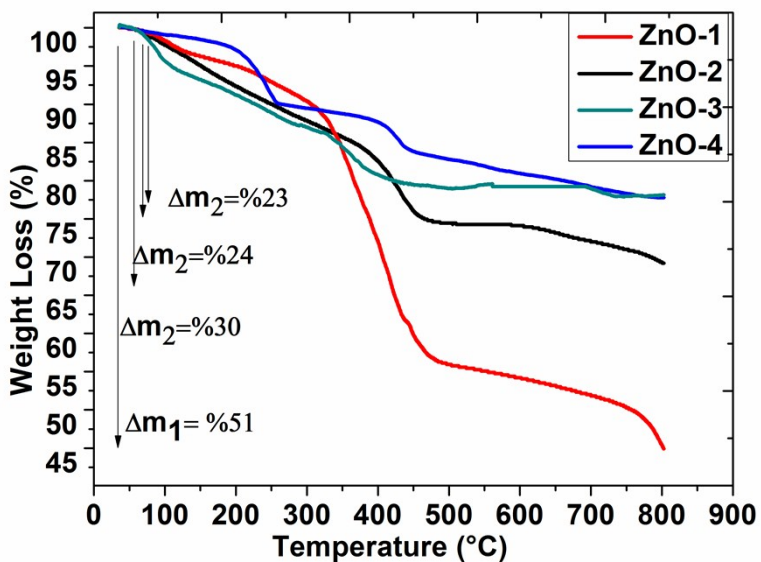

Supporting Figure 5: Thermal analysis of the synthesized ZnO QDs

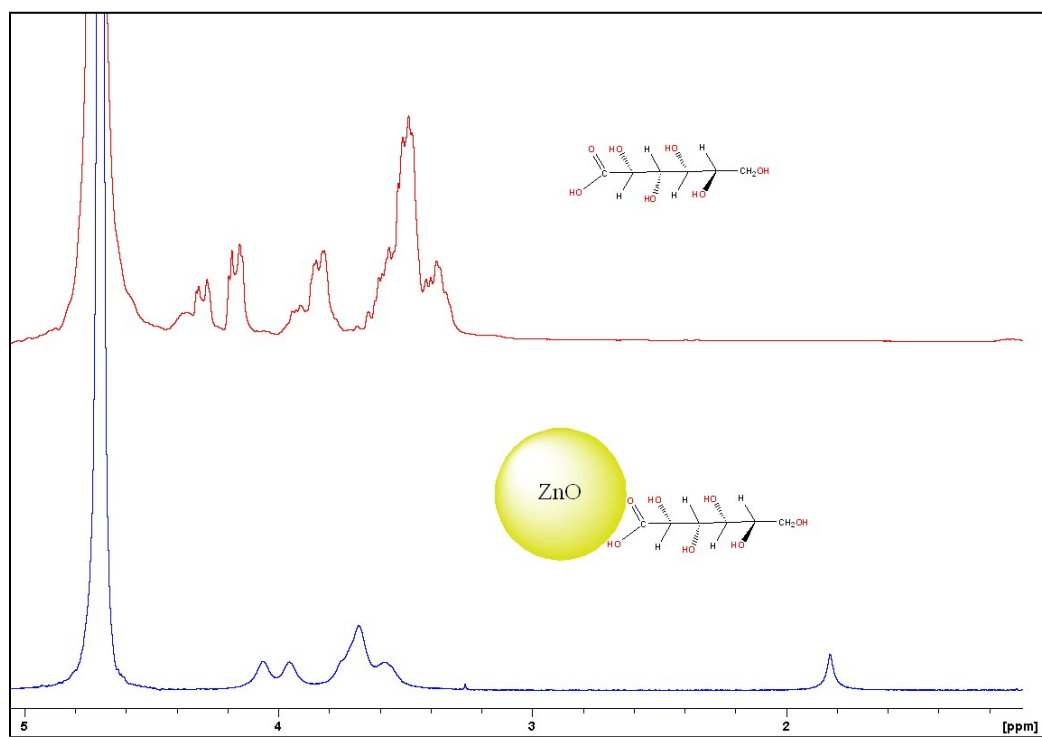

Supporting Figure 6: <sup>1</sup>H NMR spectra of the water soluble Gluconate@ZnO QDs

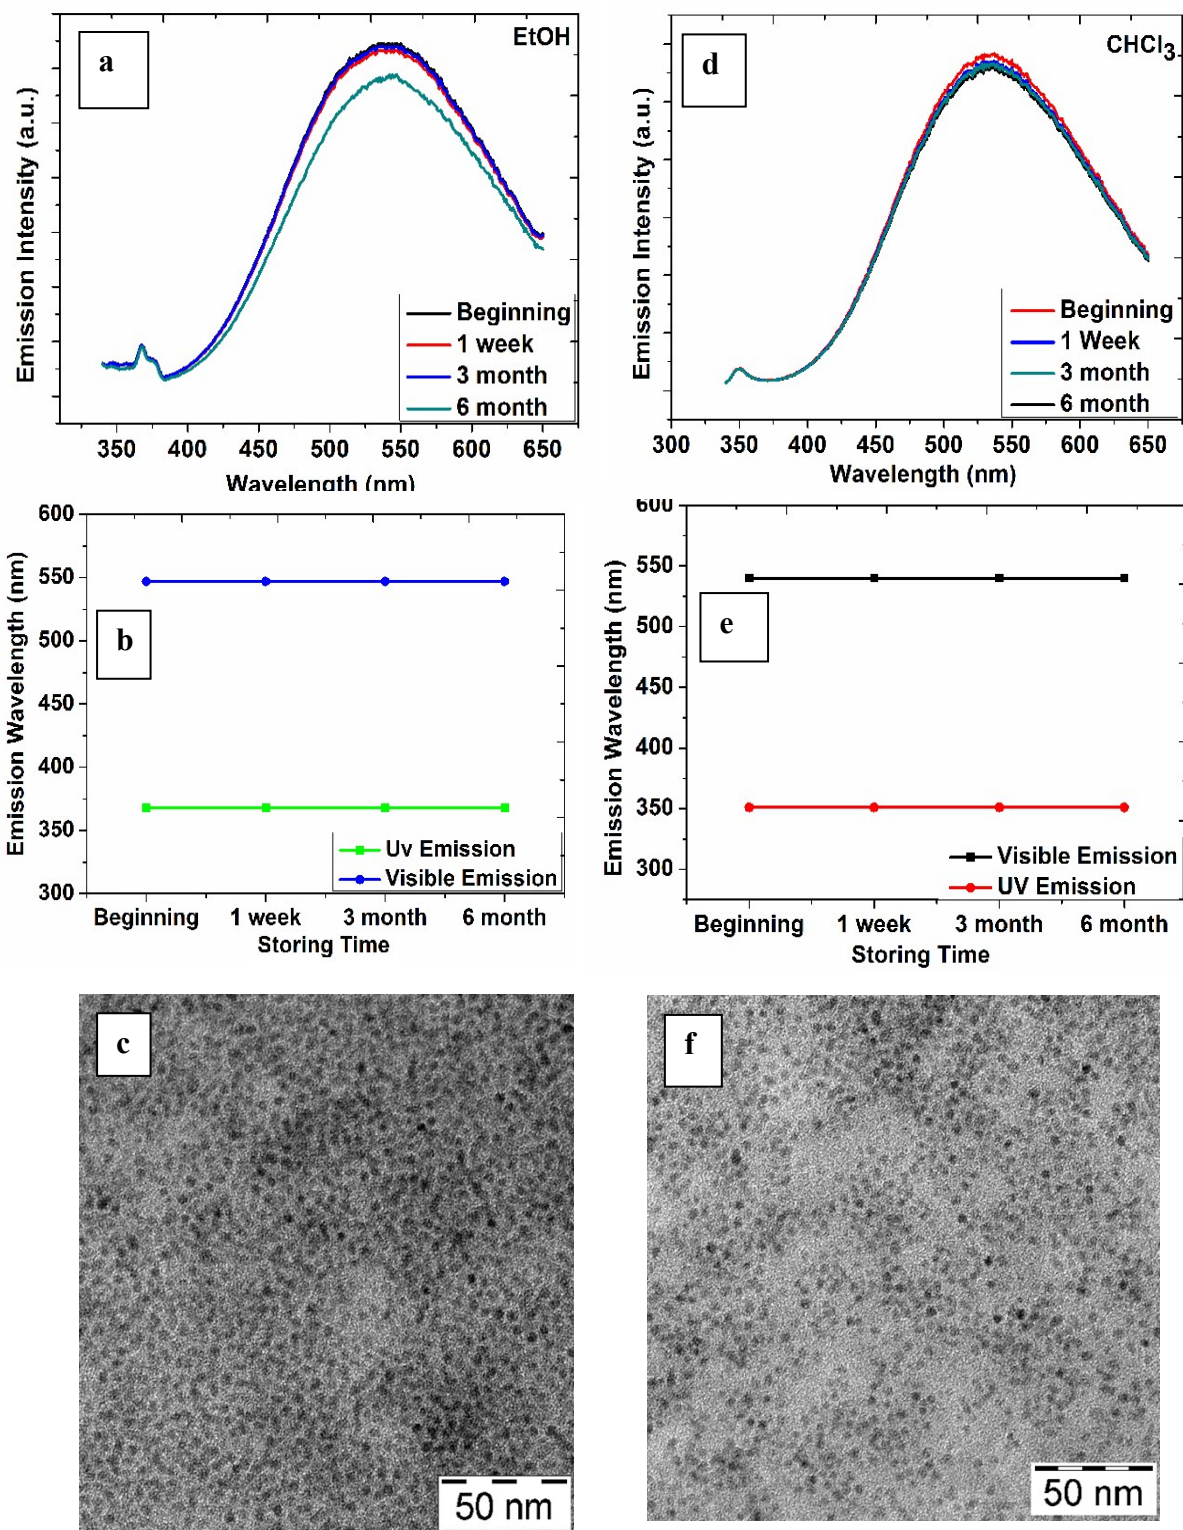

Supporting Figure 7: Stability observation of the Oleate@ZnO QD in EtOH (a-b-c) and CHCl<sub>3</sub> (d-e-f) during 6 month with their TEM analysis after storage

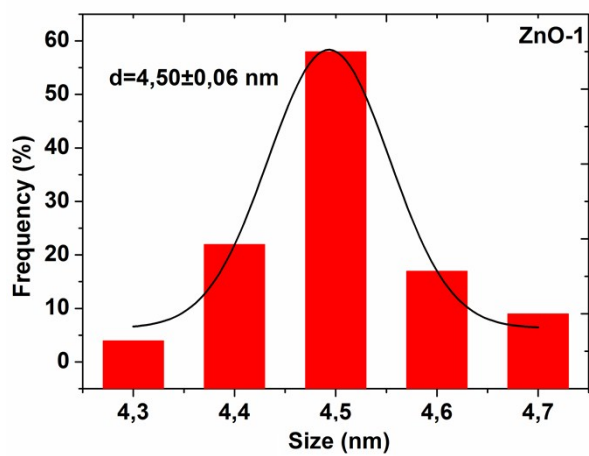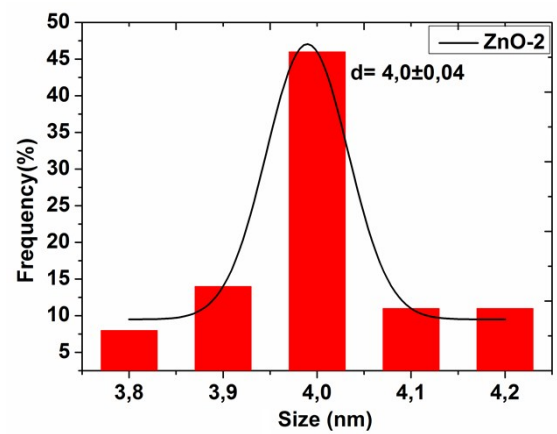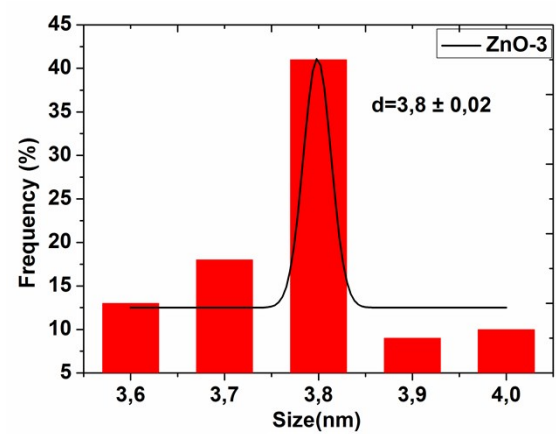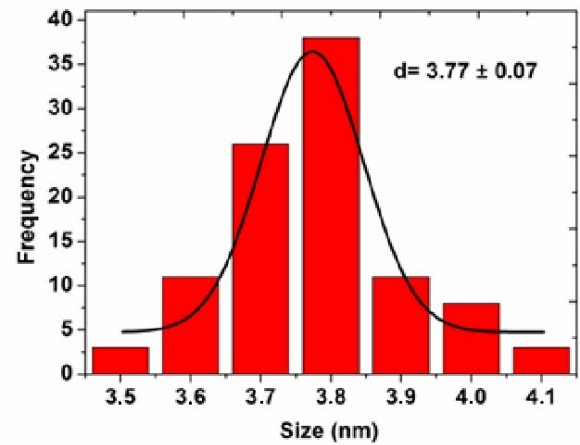

Supporting info 8: Particle size distribution of the ZnO-1, ZnO-2 ,ZnO-3 and ZnO-4 obtained from TEM investigation
